# Supplementary material for: Rapid generation of mouse models with defined point mutations by the CRISPR/Cas9 system
Source: PubMed Central journal article supplement — Sci Rep. 2014 Jun 23;4:5396. doi: 10.1038/srep05396 (PMC4066261; doi:10.1038/srep05396), 2014-06-23
Supplement: srep05396-s1.pdf [file srep05396-s1.pdf]

# **Inui et al. Supplementary Information**

Including three Supplementary Figures and two Supplementary Tables

## **Manuscript TITLE:**

**Rapid generation of mouse models with defined point mutations by the CRISPR/Cas9 system**

## **Authors list**

Masafumi Inui<sup>1\*</sup>, Mami Miyado<sup>2</sup>, Maki Igarashi<sup>2</sup>, Moe Tamano<sup>1</sup>, Atsushi Kubo<sup>3</sup>, Satoshi Yamashita<sup>1</sup>, Hiroshi Asahara<sup>1,3,4,5</sup>, Maki Fukami<sup>2</sup>, Shuji Takada<sup>1\*</sup>

<sup>1</sup>Department of Systems BioMedicine, <sup>2</sup>Department of Molecular Endocrinology, National Research Institute for Child Health and Development, Tokyo 157-8535, Japan;

<sup>3</sup>Department of Systems BioMedicine, Graduate School of Medical and Dental Sciences, Tokyo Medical and Dental University, Tokyo 113-8510, Japan;

<sup>4</sup>CREST, Japan Science and Technology Agency (JST), Saitama 332-0011, Japan;

<sup>5</sup>Department of Molecular and Experimental Medicine, The Scripps Research Institute, 10550 N. Torrey Pines Rd., La Jolla, CA 92037, USA

\* Correspondence and requests for materials: Masafumi Inui (Tel +81 3-3417-2498; FAX: +81 3-3417-2498; Email: inui-m@ncchd.go.jp) and Shuji Takada (Tel +81 3-3417-2498; FAX: +81 3-3417-2498; Email: takada-s@ncchd.go.jp)

## Supplementary Figure legend

### Supplementary Figure S1. Position of Sf-1 gRNA3, ssODN1, 4, 5 and their substitution target sites

A schematic illustration showing the locations of the Sf-1 gRNA3 and ssODNs, along with the mouse *Sf-1* locus. The blue bar and the letter indicate the position of the gRNA target with the red bar highlights the PAM sequences. ssODNs are shown in green letters at the corresponding position to the *Sf-1* locus. Red letters indicate the substitution target sites in the *Sf-1* locus and corresponding mismatched nucleotides in the ssODNs.

## **Supplementary Figure S2. The definition of mutation and substitution**

The representative sequences of the *Sox9* locus determined by direct sequencing. The top panel shows the wild type sequence without any overlapping peaks (categorized as “WT”). The second panel shows overlapped peaks at defined nucleotides (categorized as “monoallelic substitution”). The third panel shows continuous overlapping peaks (categorized as “indel”). The bottom panel shows peak overlapping at both defined nucleotides and in the following sequence (categorized as “monoallelic substitution + indel”). The targeted substitutions were indicated by red arrows and a pink background color, whereas overlapping peaks caused by random indels are indicated with a red background color.

### **Supplementary Figure S3. Off-target analysis of Sf-1 gRNAs**

(A) The sequences and positions of possible off-target sites for Sf-1 gRNAs.

OT: Off-target site.

(B) The representative results of the sequence analysis of the off-target sites. Direct sequencing of the PCR-amplified putative off-target sites from mice received the designated substitution (c.274 C>T) are shown as representative results. The possible off-target sequences were shown at the fourth to twenty-sixth bases, as indicated by the darker background color.

# Inui et al. Supplementary Figure S1

## Mouse *Sf-1* locus

5'...TTTGGAAAAGATCTGTGGCAGACACTTGGGAAGGTAGAACCCTGACAGACTGCTCCTGCCACAGCTGTGGTGTGATCGAATGCGGGTGGCCGGAAACAAGTTGGGCCCATGTACAAGAGAGACCGGGCCTTGAAGCAGCAGAA...3'  
3'...AAACCCTTTCTAGACACCGTCTGTCAACCTTCCATCTTGGACTGTCTGACGAGGACGGGTGTGACACGACAGACTAGCTTACGCCCCACCGGCTTGTTCAAACCCGGGTACATGTTCTCTGGCCCGAACTTCGTCTCT...5'

target of *Sf-1* gRNA3 PAM

5' - GACTGCTCCTGCCACAGCTGTGCGTGTGATCGAATGCGGGTGGCTGGAAACAAGTTGGGCCCATGTACAAGAGAGACCGGGCCTTGAAGCAGCAGAA-3' ssODN1  
5' - GACTGCTCCTGCCACAGCTGTGCGTGTGATCGAATGCGGGTGGCCGGAAACAAGTTGGGCCCATGTAACAAGAGAGACCGGGCCTTGAAGCAGCAGAA-3' ssODN4  
5' - GACTGCTCCTGCCACAGCTGTGTGTGCTGATCGAATGCGGGTGGCCGGAAACAAGTTGGGCCCATGTACAAGAGAGACCGGGCCTTGAAGCAGCAGAA-3' ssODN5

ssODNs (HDR templates)

# Inui et al. Supplementary Figure S2

Mouse No. 29 wild type sequence ("WT")

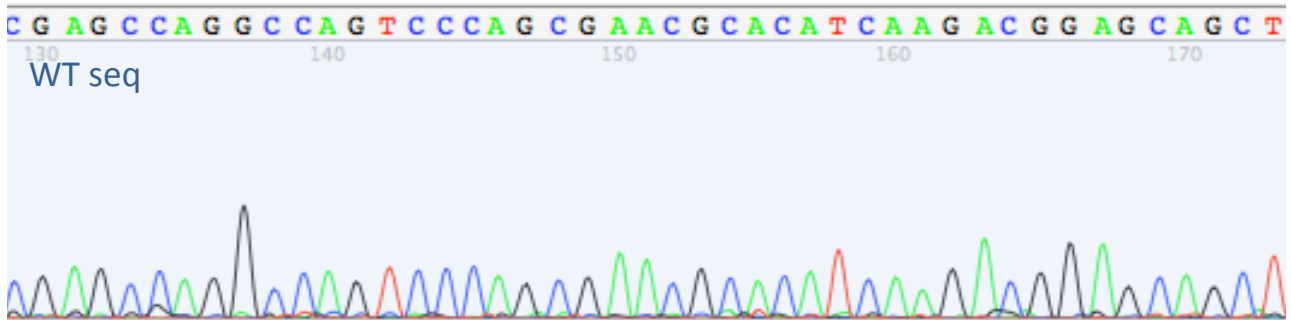

Mouse No. 4 monoallelic K-to-K substitution ("substituted")

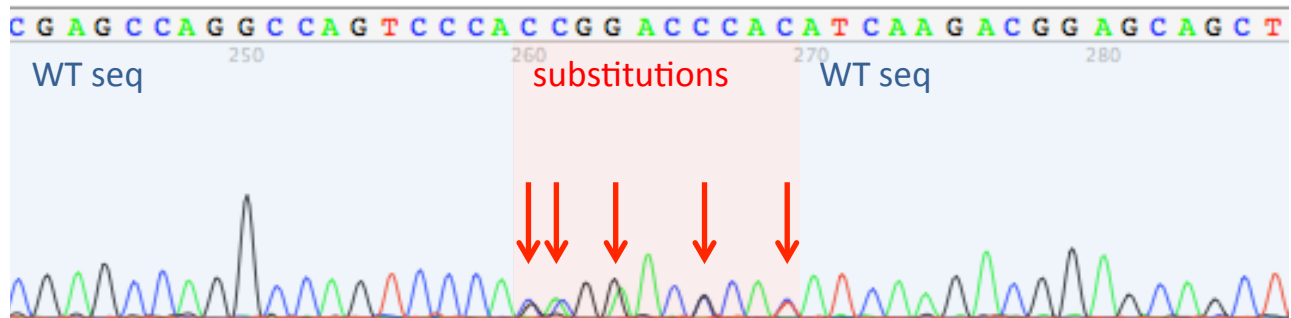

Mouse No. 36 with indel ("mutated")

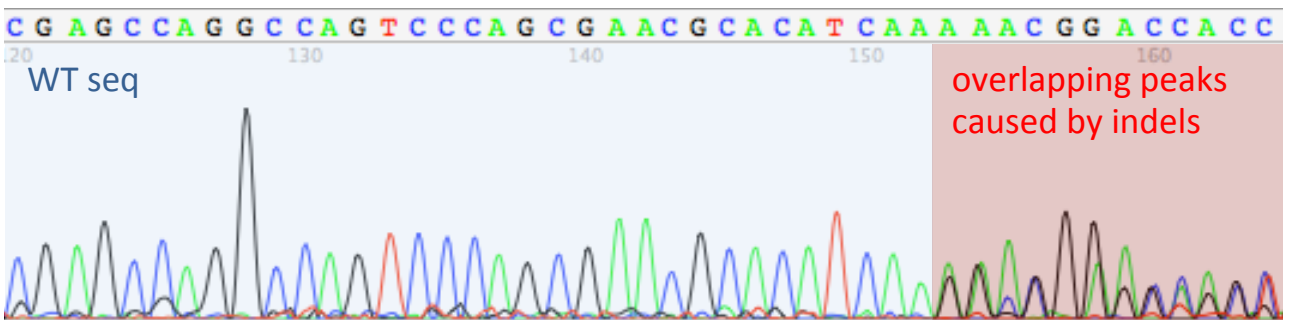

Mouse No. 27 monoallelic substitution + indel ("substituted")

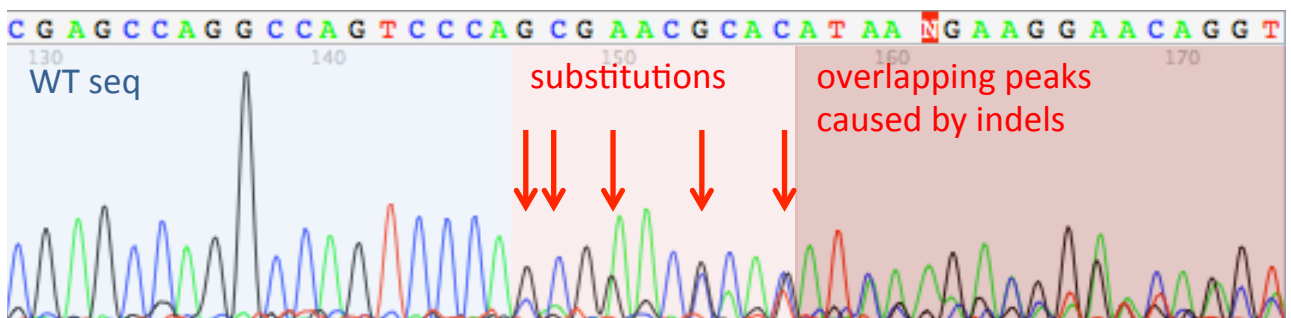

# Inui et. al Supplementary Figure S3

## A

|                        | chromosome | position                | strand | sequence                       | # mismatches |
|------------------------|------------|-------------------------|--------|--------------------------------|--------------|
| Sf-1-gRNA1 target seq. | chr2       | 38,564,062-38,564,084   | +      | <b>GTGGGCAGGAGCAGTCTGTCAGG</b> | 0            |
| Sf-1-gRNA1 OT-1        | chr7       | 148,612,950-148,612,972 | -      | GCAGCCAGGAGCAGTCTGTCTGG        | 3            |
| Sf-1-gRNA1 OT-2        | chr4       | 116,778,470-116,778,492 | +      | GTATGCAGCAGCAGTCTGTCTGG        | 3            |
| Sf-1-gRNA1 OT-3        | chr11      | 51,842,777-51,842,799   | +      | GTGAGGATGAGCAGTCTGTCTGG        | 3            |
| Sf-1-gRNA1 OT-4        | chr8       | 87,831,623-87,831,645   | +      | GCAGGCATGTGCAGTCTGTCTGG        | 4            |
| Sf-1-gRNA1 OT-5        | chr6       | 22,330,472-22,330,494   | -      | GTATGCACGGGCAGTCTGTCAAG        | 4            |
| Sf-1-gRNA2 target seq. | chr2       | 38,564,035-38,564,057   | -      | <b>GTGCGTGCTGATCGAATGCCGGG</b> | 0            |
| Sf-1-gRNA2 OT-1        | chr15      | 82,000,998-82,001,020   | +      | GTTTCATGTTGATGGAATGCCGAG       | 4            |
| Sf-1-gRNA2 OT-2        | chr13      | 93,916,133-93,916,155   | -      | GTGCTTGATTATTGAATGCCAAG        | 4            |
| Sf-1-gRNA2 OT-3        | chr13      | 55,723,514-55,723,536   | -      | TGGCGTGCTGAAGGAATGCCAAG        | 4            |
| Sf-1-gRNA2 OT-4        | chr15      | 17,258,555-17,258,577   | +      | TTGTGTGCTGATAGAATGCAAG         | 4            |
| Sf-1-gRNA3 target seq. | chr2       | 38,564,016-38,564,038   | -      | <b>GGGGTGGCCGGAACAAGTTTGGG</b> | 0            |
| Sf-1-gRNA3 OT-1        | chr8       | 49,395,258-49,395,280   | +      | GAGGAGGCCGGAACAAGTTAAGG        | 3            |
| Sf-1-gRNA3 OT-2        | chr12      | 106,627,747-106,627,769 | -      | GGGGAGGGGGAACAAGTTTGGG         | 3            |
| Sf-1-gRNA3 OT-3        | chr2       | 166,995,191-166,995,213 | -      | TGGGTGGCAGGAACAAGTTGGG         | 3            |
| Sf-1-gRNA3 OT-4        | chr2       | 23,010,345-23,010,367   | +      | AGGGTGGACAGAACAATTTAAG         | 4            |
| Sf-1-gRNA3 OT-5        | chr17      | 89,072,909-89,072,931   | -      | GGGGTTCGAGAACAAGTTTCAG         | 4            |

## B

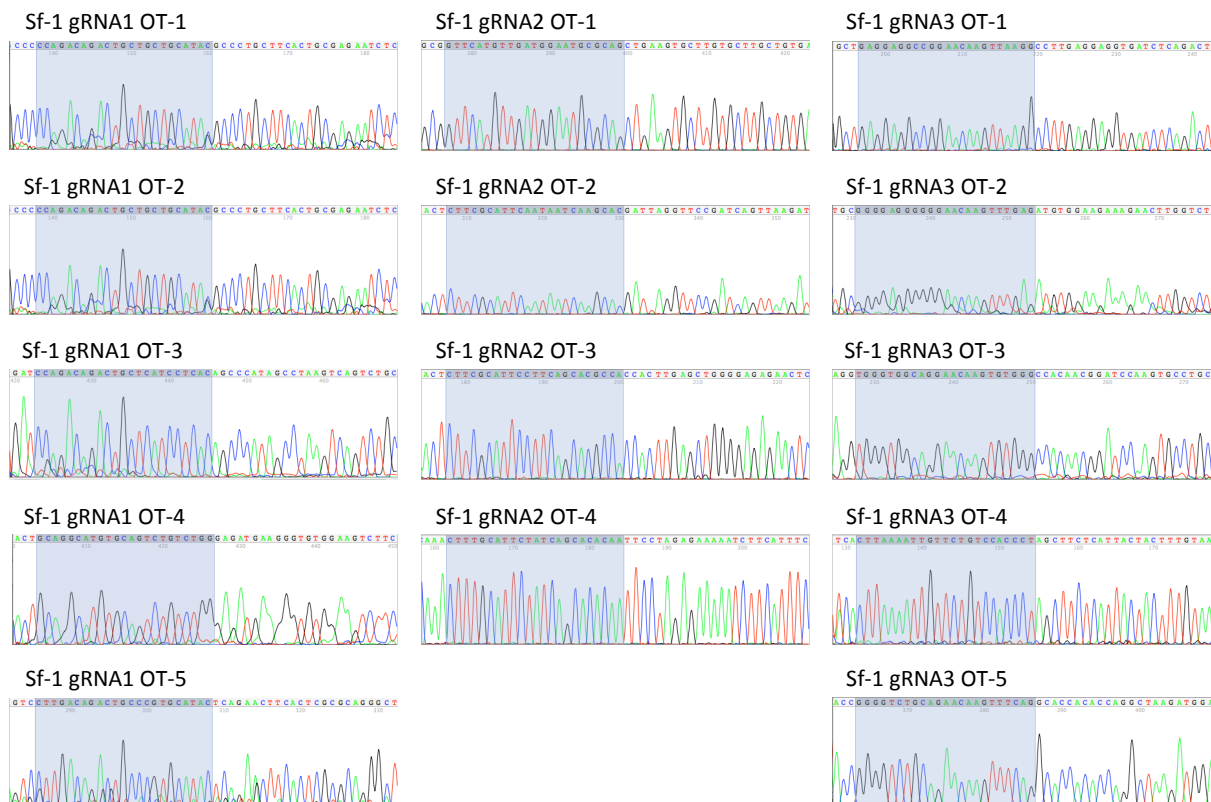

Supplementary Table S1. Summary of experiments comparing various positions of the point mutations

| Experiment | Microinjection |       | Survival of zygotes              |             |           | Result of genotyping              |                                 |       |    | Ratio of genotype                  |                                |
|------------|----------------|-------|----------------------------------|-------------|-----------|-----------------------------------|---------------------------------|-------|----|------------------------------------|--------------------------------|
|            | gRNA           | ssODN | 2 cell embryo / injected zygotes | Transferred | Genotyped | Monoallelic substitution (+indel) | Biallelic substitution (+indel) | Indel | WT | Mouse with substituted alleles (%) | Mouse with mutated alleles (%) |
| 4          | 3              | 1     | 157/217                          | 144         | 54        | 10 (7)                            | 6 (5)                           | 28    | 10 | 16 (29.6)                          | 44 (81.5)                      |
| 5          | 3              | 4     | 136/142                          | 136         | 25        | 3 (2)                             | 1 (0)                           | 16    | 5  | 5 (20.0)                           | 24 (82.8)                      |
| 6          | 3              | 5     | 108/110                          | 108         | 17        | 0 (0)                             | 0 (0)                           | 16    | 1  | 0 (0)                              | 16 (94.1)                      |



**Supplementary Table S2. Summary of off-target effects by Sf-1 gRNAs**

| <b>Target sites</b> | <b>Mouse with mutated alleles /<br/>genotyped (%)</b> |
|---------------------|-------------------------------------------------------|
| Sf-1-gRNA1 OT-1     | 0/1 (0)                                               |
| Sf-1-gRNA1 OT-2     | 0/1 (0)                                               |
| Sf-1-gRNA1 OT-3     | 0/1 (0)                                               |
| Sf-1-gRNA1 OT-4     | 0/1 (0)                                               |
| Sf-1-gRNA1 OT-5     | 0/1 (0)                                               |
| Sf-1-gRNA2 OT-1     | 0/9 (0)                                               |
| Sf-1-gRNA2 OT-2     | 0/9 (0)                                               |
| Sf-1-gRNA2 OT-3     | 0/9 (0)                                               |
| Sf-1-gRNA2 OT-4     | 0/9 (0)                                               |
| Sf-1-gRNA3 OT-1     | 0/16 (0)                                              |
| Sf-1-gRNA3 OT-2     | 0/16 (0)                                              |
| Sf-1-gRNA3 OT-3     | 0/16 (0)                                              |
| Sf-1-gRNA3 OT-4     | 0/16 (0)                                              |
| Sf-1-gRNA3 OT-5     | 0/16 (0)                                              |
